# Supplementary material for: Finger stick blood test to assess post vaccination SARS-CoV-2 neutralizing antibody response against variants
Source: bioRxiv or medRxiv preprint supplement (doi:10.1101/2021.11.11.21266241), 2021-11-14
Supplement: Supplementary file [file media-1.pdf]

## Supporting Information

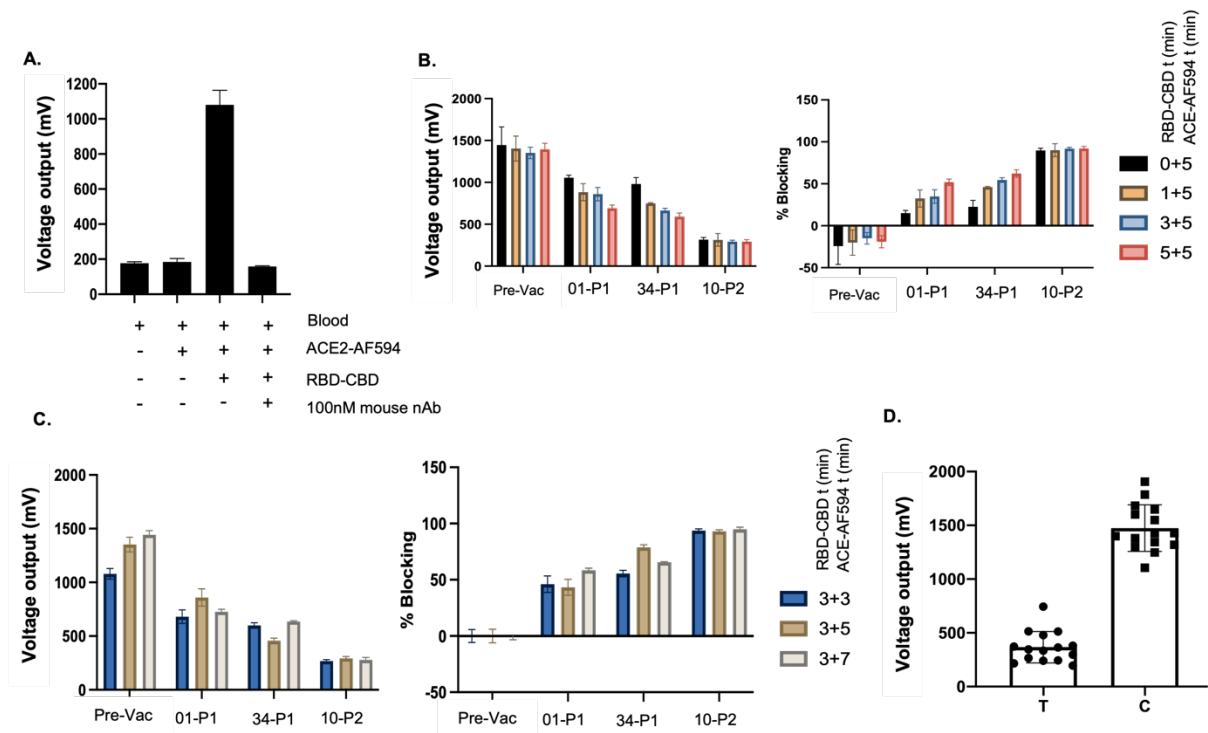

**Fig. S1. Optimization of modified cpVNT with Alexa Fluor594 labeled ACE2.**

**A.** Fluorescence intensity (voltage output) measured with blood samples in the presence and absence of mouse monoclonal SARS-CoV-2 nAb. **B.** Four different participants' samples: pre-vaccination (Pre-Vac), post 1<sup>st</sup> dose (01-P1, 34-P1) and post 2<sup>nd</sup> dose (P2) were used for optimization of RBD-CBD incubation time and **C.** ACE2-AF594 incubation time. All samples were tested in triplicates. **D.** Comparison of fluorescent intensity between Test spot-T and Control spot-C with 15 post 2<sup>nd</sup> dose vaccinees' whole blood samples.

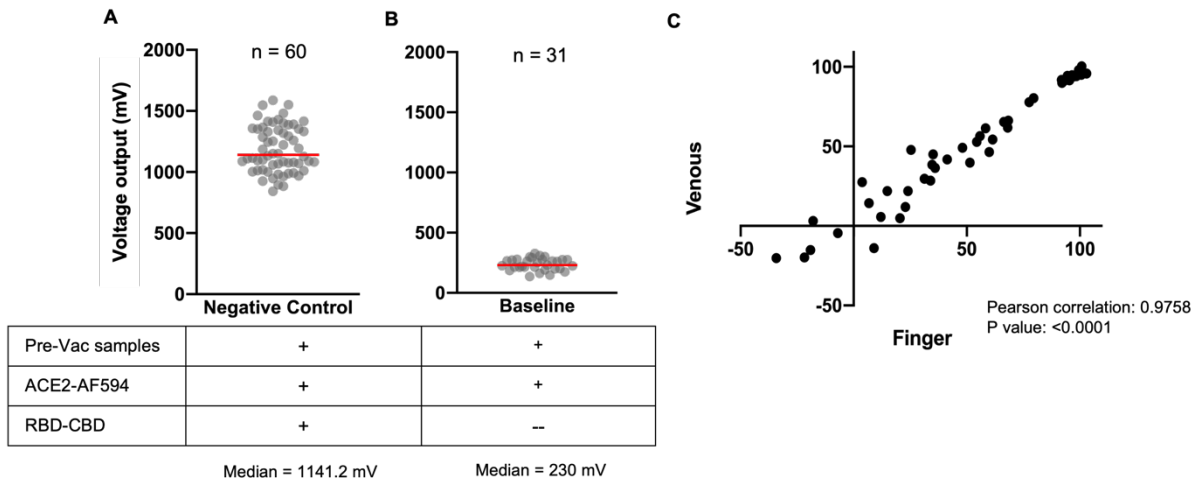

**Fig. 2. Signal intensity for negative control and baseline as well as correlation of plasma and whole blood samples with modified cpVNT.**

**A.** Fluorescence intensity (voltage output) measured from 60 pre-vaccination blood samples, red line represents median of the distribution, 1141 mV; which is the value used as NC for % blocking calculation. **B.** Total 31 samples (pre and post vaccination) were measured in the absence of RBD-CBD, where the red line is the median, 230 mV. **C.** A total of 46 matching samples of finger stick and venous blood showed strong correlation (Pearson  $r$ : 0.9758,  $p$  < 0.0001) in percent blocking detection using the modified cpVNT.

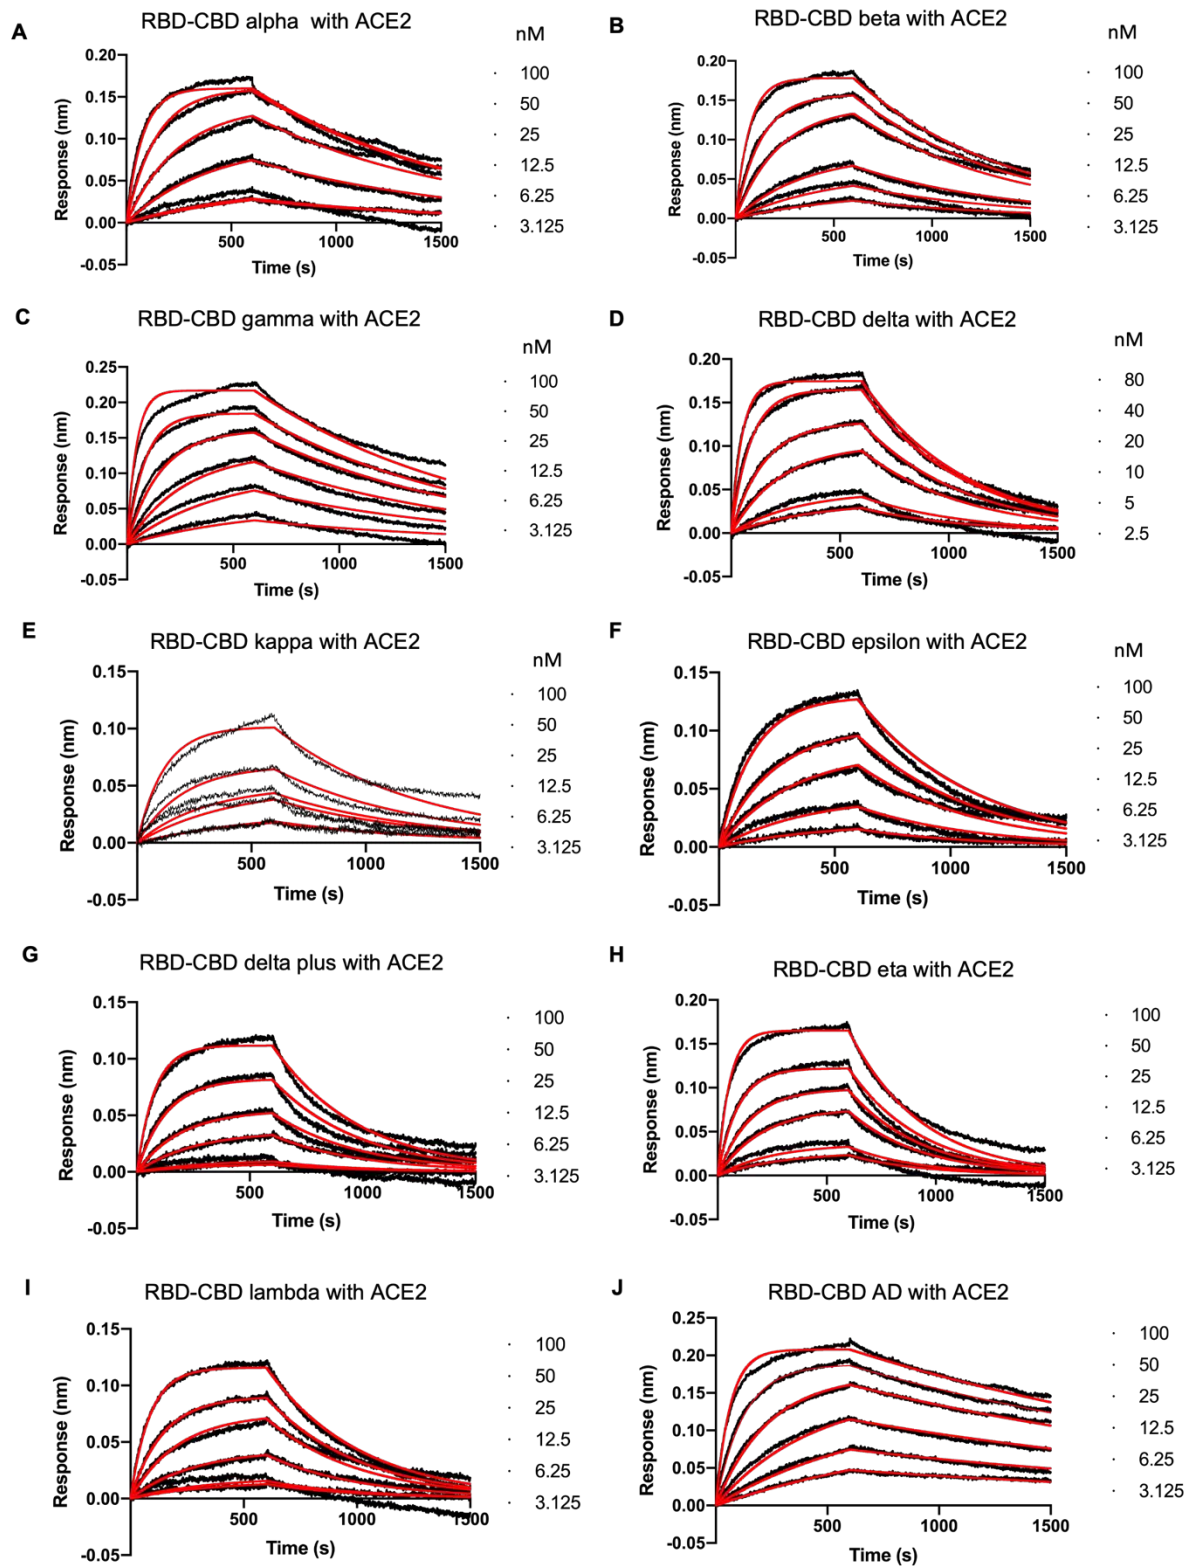

**Fig. S3 Biolayer interferometry profiles for RBD-CBD variants with biotinylated ACE2 immobilized on streptavidin biosensors.**

**A.** RBD-CBD alpha, **B.** RBD-CBD beta, **C.** RBD-CBD gamma, **D.** RBD-CBD delta, **E.** RBD-CBD kappa, **F.** RBD-CBD epsilon, **G.** RBD-CBD delta plus, **H.** RBD-CBD eta, **I.** RBD-CBD lambda and **J.** RBD-CBD AD

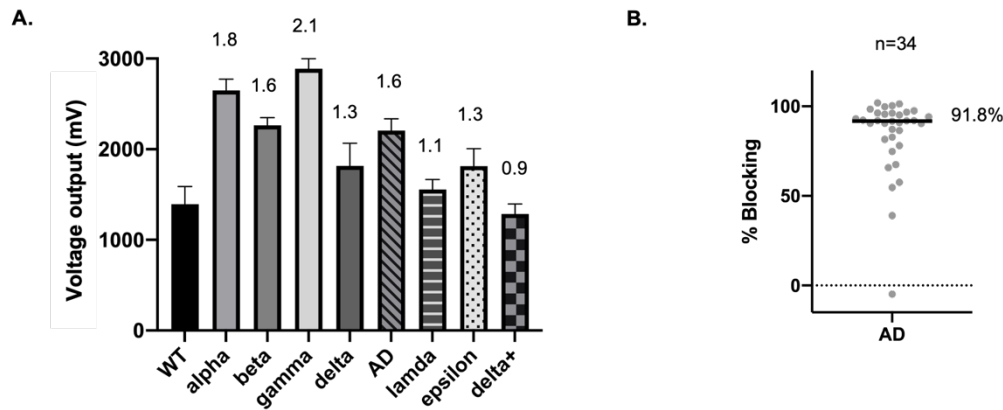

**Fig. S4 Signal intensity of RBD-CBD variants' response with fluorescence labelled ACE2.**

**A.** The fluorescence intensity (voltage output) of pre vaccination blood sample when tested against wildtype (WT) and RBD-CBD variants of different binding affinity against ACE2. The numbers above each bar indicate fold of increase in intensity as compared to WT. **B.** The nAb percent blocking measured from 34 post 2<sup>nd</sup> dose vaccinated samples (within 3 months) against AD, the hypothetical RBD-CBD.

**Table S1. Fluorescence intensity (voltage output) measured from two batches of ACE2-AF594 with pre vaccinate blood samples for negative control calibration.**

| ACE2-AF594 Batch | RBD-CBD Concentration (nM) | Fluorescence intensity for NC | # Samples | Fluorescence intensity for baseline | # Samples |
|------------------|----------------------------|-------------------------------|-----------|-------------------------------------|-----------|
| 1                | 10                         | 1088.7 ( $\pm$ 179.8)         | 17        | 181.1 ( $\pm$ 18.3)                 | 7         |
| 2                | 10                         | 1235.5 ( $\pm$ 185.9)         | 43        | 254.1 ( $\pm$ 25.9)                 | 24        |

**Table S2: Samples used for modified cpVNT-blood in comparison with pVNT, cPass and cpVNT-plasma**

| Sample ID            | Vaccination status | % Neutralization in pVNT | % Inhibition in cPass | % Blocking cpVNT-blood | % Blocking cpVNT-plasma |
|----------------------|--------------------|--------------------------|-----------------------|------------------------|-------------------------|
| 0001-V-V05-PV        | Pre-Vac            |                          | -7.763312             | 22.94239               |                         |
| 0003-F-V03-PV        | Pre-Vac            |                          | -17.49623             | -18.20988              |                         |
| 0004-V-V01-PV        | Pre-Vac            | 0                        |                       | 19.75356               | 19.01346                |
| 0004-V-V04-PV        | Pre-Vac            |                          | -2.99429              | -7.40E-15              |                         |
| 0004-F-V06-PV        | Pre-Vac            |                          | -5.805046             | 12.53561               |                         |
| 0005-V-V01-PV        | Pre-Vac            |                          | -13.7654              | 27.02332               |                         |
| 0007-V-V01-PV        | Pre-Vac            | 0                        | -10.4598              | 11.35117               | 11.89958                |
| 0008-V-V01-PV        | Pre-Vac            | 0                        | -14.8892              | 11.96845               | -21.78846               |
| 0009-V-V01-PV        | Pre-Vac            |                          | -8.86967              | 13.20597               |                         |
| 0011-V-V01-PV        | Pre-Vac            |                          | -11.27776             | -27.88066              |                         |
| 0013-F-V06-PV        | Pre-Vac            |                          | -5.521211             | -12.65432              |                         |
| 0013-F-V08-PV        | Pre-Vac            | 0                        |                       | 8.40192                |                         |
| 0022-F-V01-PV        | Pre-Vac            |                          | 1.500837              | -11.34092              |                         |
| 0022-V-V01-PV        | Pre-Vac            | 0.12                     | 11.52455              | 21.31724               | 15.95626                |
| 0026-F-V01-PV        | Pre-Vac            |                          | -6.576852             | -38.8203               |                         |
| 0027-F-V01-PV        | Pre-Vac            |                          | 3.549902              | 12.41427               |                         |
| 0030-F-V01-PV        | Pre-Vac            |                          | 7.101754              | 14.3                   |                         |
| 0036-V-V01-PV        | Pre-Vac            | 0                        |                       | 9.84225                | 11.50885                |
| 0042-V-V01-PV        | Pre-Vac            |                          |                       | 12.89438               | 8.254454                |
| 0054V-V01-PV         | Pre-Vac            |                          |                       | 1.646091               | -4.238932               |
| 0001-F-V09-P1-02W-MD | P1                 |                          | 66.0465               | 31.893                 |                         |
| 0001-V-V12-P1-05W-MD | P1                 | 43.56                    | 72.68333              | 36.07682               | 73.514022               |
| 0003-V-V06-P1-03W-PF | P1                 | 1.03                     | 44.83542              | 21.46776               | 17.1909                 |
| 0004-V-V10-P1-03W-MD | P1                 |                          | 75.51875              | 22.39369               |                         |
| 0009-V-V02-P1-03W-PF | P1                 | 3.21                     | 10.31425              | 28.45651               | 8.348457                |

|                      |    |       |          |          |          |
|----------------------|----|-------|----------|----------|----------|
| 0010-V-V03-P1-01W-MD | P1 |       | -8.83867 | 22.97668 | 19.5426  |
| 0010-F-V06-P1-03W-MD | P1 |       | 89.66134 | 73.07956 |          |
| 0011-V-V02-P1-03W-PF | P1 |       | 31.8281  | 34.12209 |          |
| 0012-V-V01-P1-03W-PF | P1 | 3.02  | 41.51574 | 39.16324 | 28.42025 |
| 0013-F-V09-P1-02W-MD | P1 |       | 67.62917 | 20.78189 |          |
| 0019-V-V2-P1-03W-PF  | P1 | 37.75 | 63.88273 | 27.02332 | 50.4968  |
| 0020-F-V01-P1-04W-PF | P1 |       | 81.96858 | 31.48148 |          |
| 0022-F-V02-P1-01W-PF | P1 |       | 1.500837 | 10.90535 |          |
| 0022-V-V04-P1-06W-PF | P1 | 37.75 | 71.37292 | 41.46091 | 60.19754 |
| 0025V-V03-P1-6W-PF   | P1 |       |          | 48.76543 | 53.05427 |
| 0045V-V05-P1-5W-PF   | P1 |       |          | 61.21399 | 64.01905 |
| 0046V-V01-P1-3W-MD   | P1 |       |          | 80.55843 | 96.97219 |
| 0049-V-V01-P1-03W-MD | P1 |       | 79.53542 | 39.47188 | 52.93668 |
| 0052-V-V01-P1-05W-PF | P1 | 36.48 | 72.69792 | 28.01783 | 54.58287 |
| 0053V-V01-P1-5W-PF   | P1 | 44.46 | 71.42917 | 38.13443 | 74.68987 |
| 0054-V-V02-P1-03W-PF | P1 |       |          | 43.34705 | 33.47639 |
| 0062V-V01-P1-5W-MD   | P1 |       |          | 75.5144  | 83.94967 |
| 0001-V-V16-P2-02W-MD | P2 |       | 96.88125 | 95.81619 | 99.88242 |
| 0002-V-V07-P2-07W-PF | P2 |       | 97.30353 | 104.3553 |          |
| 0002-V-V09-P2-14W-PF | P2 | 96.19 | 96.91042 | 90.84362 | 99.58845 |
| 0004-F-V12-P2-01W-MD | P2 |       | 71.09583 | 40.9808  |          |
| 0004-V-V14-P2-02W-MD | P2 | 97.46 | 96.775   | 91.80384 | 99.94121 |
| 0006-V-V01-P2-01W-MD | P2 | 48.63 | 91.3985  | 90.18098 |          |

|                      |    |           |           |           |           |
|----------------------|----|-----------|-----------|-----------|-----------|
| 0007-V-V08-P2-03W-MD | P2 | 94.56     | 96.81875  | 91.02304  | 95.18118  |
| 0009-V-V03-P2-03W-PF | P2 | 63.7      | 93.34792  | 84.22497  |           |
| 0009-V-V04-P2-12W-PF | P2 |           |           | 56.15305  | 63.6075   |
| 0010-F-V07-P2-01W-MD | P2 |           | 94.50406  | 88.40878  |           |
| 0024-F-V01-P2-08W-PF | P2 |           | 96.54536  | 85.69959  |           |
| 0028-F-V01-P2-09W-PF | P2 |           | 92.88269  | 81.44719  |           |
| 0029-F-V01-P2-05W-PF | P2 |           | 81.82083  | 63.3059   |           |
| 0034-V-V03-P2-02W-MD | P2 | 99.64     | 97.06042  | 96.46776  | 99.88242  |
| 0046V-V02-P2-3W-MD   | P2 |           |           | 94.20439  | 95.70815  |
| 0067V-V01-P2-3W-PF   | P2 |           |           | 79.13328  | 61.02064  |
| <b>Total samples</b> |    | <b>20</b> | <b>45</b> | <b>58</b> | <b>30</b> |

**Table S3: The percent inhibition of WHO International Standard and Reference Panel's plasma measured using cPass™.**

| <b>WHO Plasma Standard &amp; References</b> | <b>Neutralizing activity (IU/mL)</b> | <b>% Inhibition measured in cPass</b> |
|---------------------------------------------|--------------------------------------|---------------------------------------|
| International Standard                      | 1000                                 | 94.3 (±0.26)                          |
| International Standard (1:1 dilution)       | 500                                  | 90.6 (±0.73)                          |
| Mid titre                                   | 210                                  | 78.7 (±0.65)                          |
| Low titre                                   | 44                                   | 19.0 (±3.2)                           |
| Low titre (1:1 dilution)                    | 22                                   | 8.3 (±1.4)                            |
